# Supplementary material for: Importance of Application Rates of Compost and Biochar on Soil Metal(Loid) Immobilization and Plant Growth
Source: MDPI journal article supplement (doi:10.3390/plants12112077), 2023-05-23
Supplement: s1 [file s1]

Table S1: Properties of Pontgibaud technosol, biochar and compost used in the experiment.

|                         | Properties                                         | Value          | Reference                                                     |
|-------------------------|----------------------------------------------------|----------------|---------------------------------------------------------------|
| Pontgibaud<br>technosol | pH                                                 | 4.80 - 4.99    | 29 - 31                                                       |
|                         | EC ( $\mu\text{S.cm}^{-1}$ )                       | 262 - 599      |                                                               |
|                         | [As] ( $\text{mg.L}^{-1}$ )                        | 0.01 - 0.022   |                                                               |
|                         | [Pb] ( $\text{mg.L}^{-1}$ )                        | 12.307 - 56.97 |                                                               |
|                         | Organic matter content (%)                         | 1.42           |                                                               |
|                         | Total nitrogen ( $\text{mg.kg}^{-1}$ )             | 75             |                                                               |
|                         | Cation exchange capacity (%<br>CaCO <sub>3</sub> ) | 0.7            |                                                               |
| Biochar                 | Particle size (mm)                                 | 0.5–1          | 32                                                            |
|                         | pH                                                 | 8.46           |                                                               |
|                         | EC ( $\mu\text{S.cm}^{-1}$ )                       | 302            |                                                               |
|                         | WHC (%)                                            | 212            |                                                               |
|                         | Specific area ( $\text{m}^2.\text{g}^{-1}$ )       | 4.38           |                                                               |
|                         | Total pore volume ( $\text{cm}^3.\text{g}^{-1}$ )  | 0.01           |                                                               |
|                         | Mean pore diameter (nm)                            | 9.13           |                                                               |
| Compost                 | Particle size (mm)                                 | 0-5            | Klasmann-<br>Deilmann,<br>Saint-Louis-<br>du-Rhône:<br>France |
|                         | pH                                                 | 6              |                                                               |
|                         | EC ( $\text{mS.cm}^{-1}$ )                         | 35             |                                                               |
|                         | Water retention capacity                           | 80%            |                                                               |
